# Supplementary material
Source: publisher figshare collection journal article supplement (https://acs.figshare.com/ndownloader/files/22395243)

## Supporting Information

### Metalloprotein-Catalyzed Click Reaction for In Situ Generation of a Potent Inhibitor

Yuka Miyake, Yukihiro Itoh, Yoshinori Suzuma, Hidehiko Kodama, Takashi Kurohara, Yasunobu

Yamashita, Remy Narozny, Yutaro Hanatani, Shusaku Uchida, and Takayoshi Suzuki\*

\*Corresponding author: tkyssuzuki@sanken.osaka-u.ac.jp

#### Contents

|                                                                            |    |
|----------------------------------------------------------------------------|----|
| ▪ Figures S1-S8                                                            | 2  |
| ▪ Tables S1-S5                                                             | 9  |
| ▪ Chemical synthesis                                                       | 15 |
| ▪ ICP-AES analysis                                                         | 24 |
| ▪ Free metal ion-catalyzed azide-alkyne cycloaddition by HPLC analysis     | 24 |
| ▪ UV-vis spectral analysis                                                 | 24 |
| ▪ NMR spectrum of <i>anti</i> -T31, <i>syn</i> -T31, and <i>anti</i> -T31' | 25 |

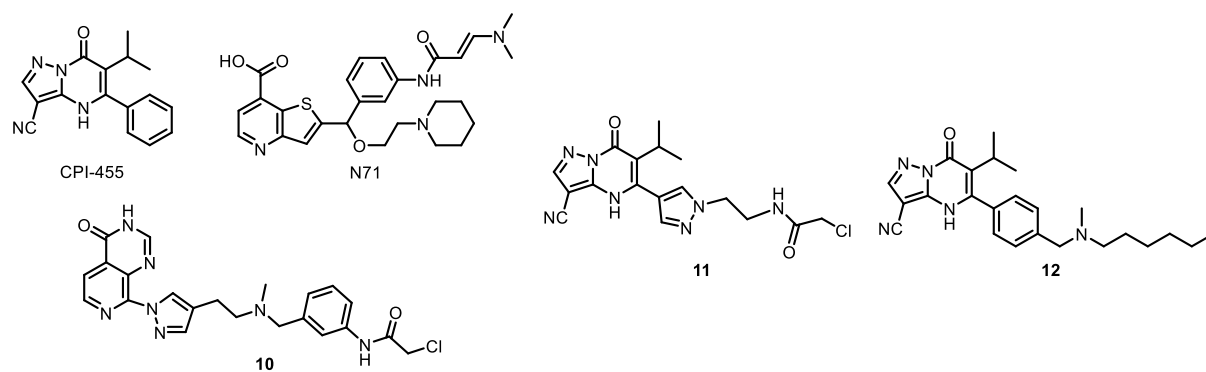

**Figure S1.** Structures of representative reported KDM5 inhibitors.

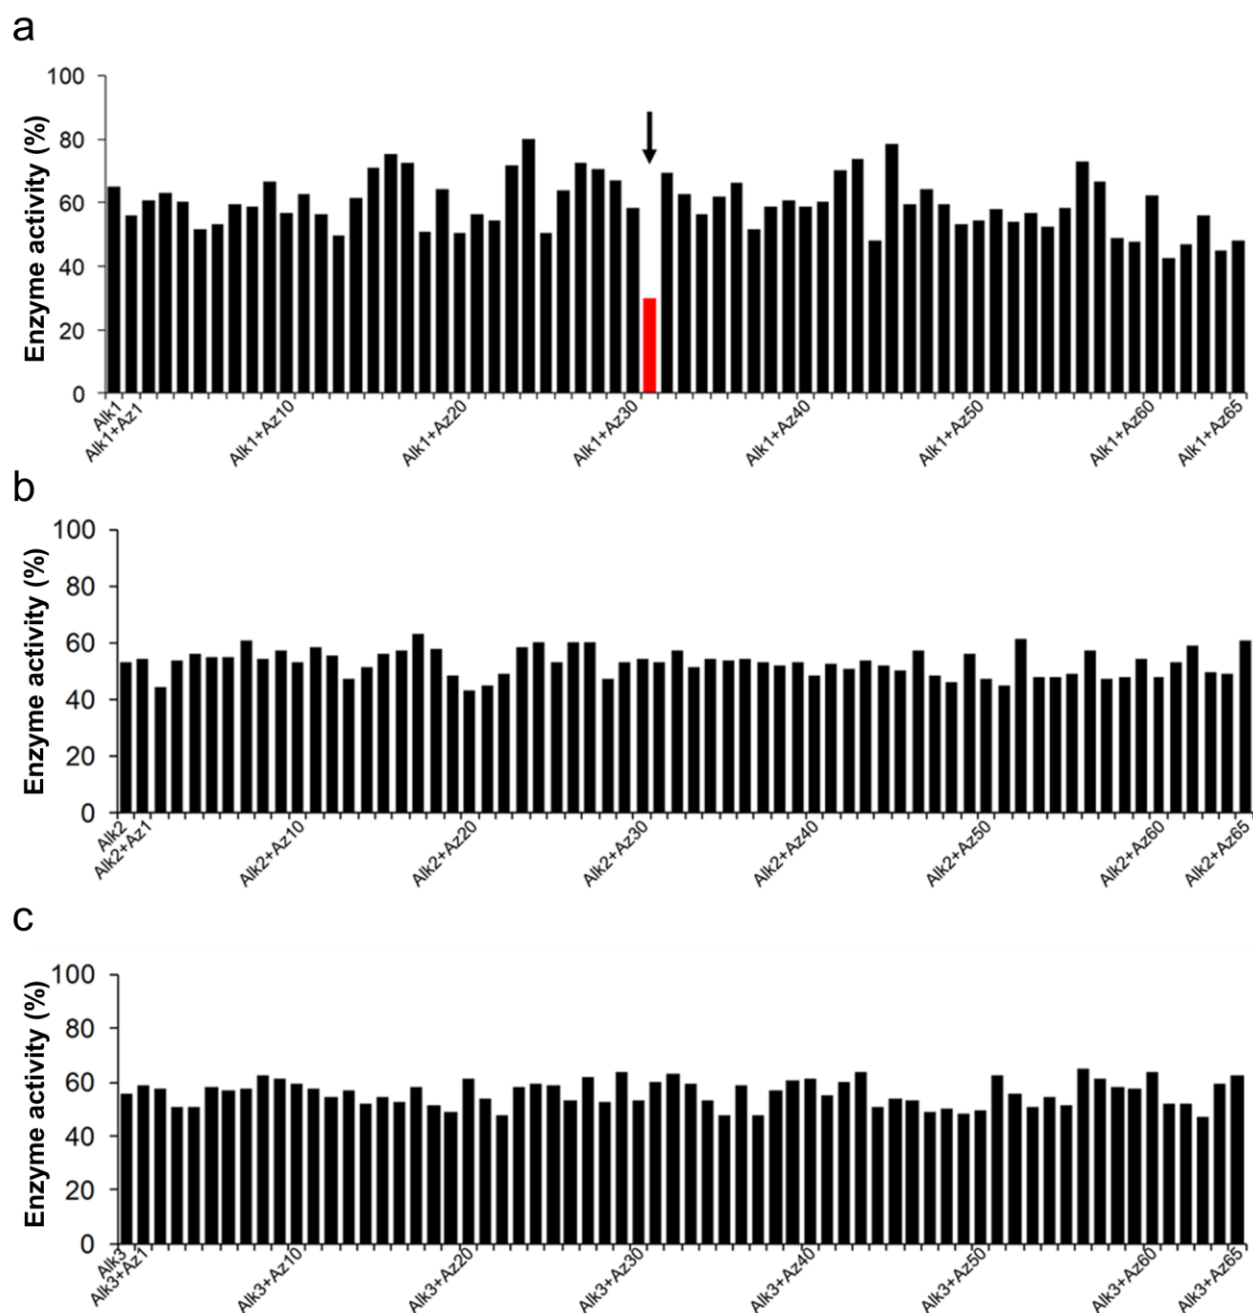

**Figure S2.** In situ click chemistry screenings for hit alkyne/azide combinations by KDM5C assay using AlphaLISA screening systems. The enzyme activities were evaluated in the presence of **Alk1** (150  $\mu$ M) (a), **Alk2** (400  $\mu$ M) (b), or **Alk3** (200  $\mu$ M) (c) without azide or with **Az1–65** (125  $\mu$ M). The hit was the combination of **Alk1** and **Az31** (arrow).

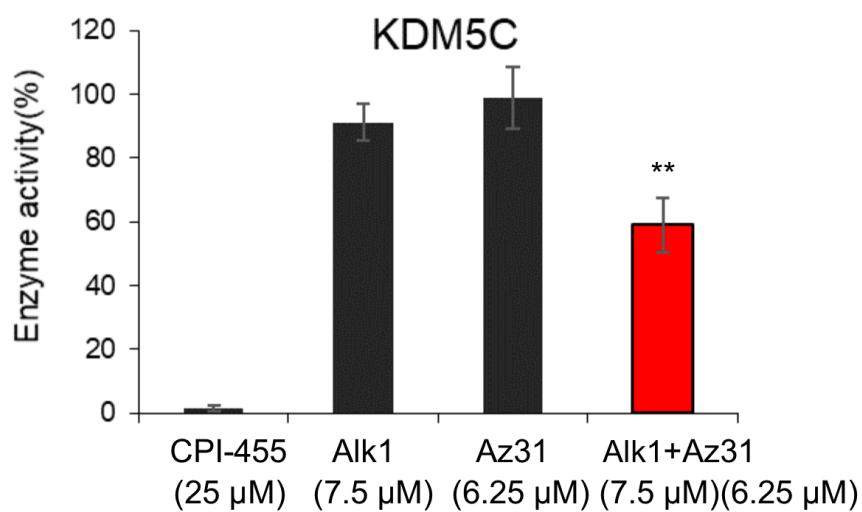

**Figure S3.** KDM5C activities after in situ click chemistry. The %KDM5C activities were evaluated by AlphaLISA screening assay. Values were calculated from three independent determinations. Bars represent means  $\pm$  SD from three independent experiments: \*\* $P < 0.01$ . ANOVA and Bonferroni-type multiple  $t$  test results indicated a significant difference between **Alk1** or **Az31** alone and the combination of **Alk1** with **Az31**.

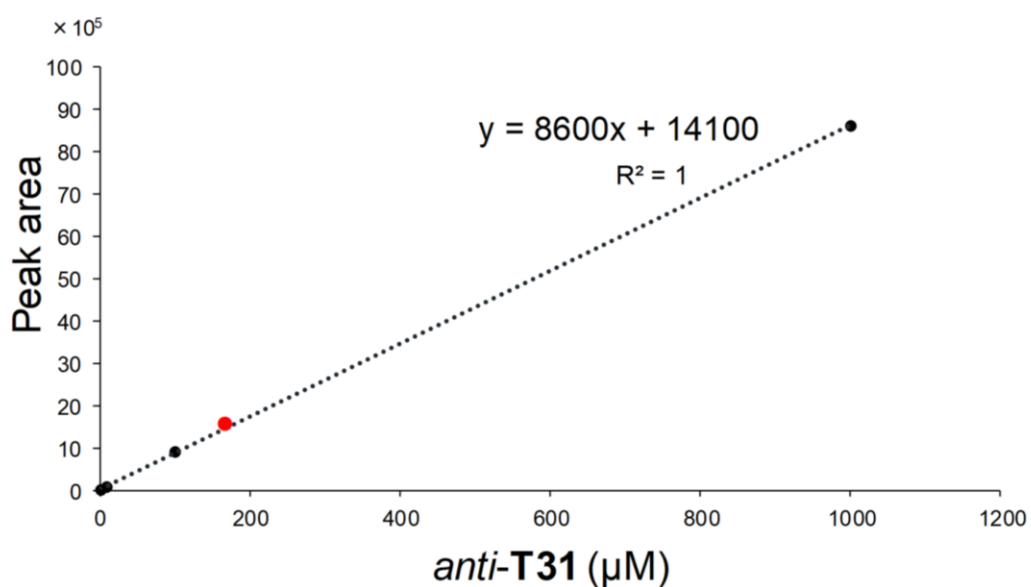

**Figure S4.** Standard curve of concentration of *anti*-T31 (1000  $\mu\text{M}$ , 100  $\mu\text{M}$ , 10  $\mu\text{M}$ , 1  $\mu\text{M}$ ) versus peak area in HPLC analysis, and determination of the concentration of the in situ product. The red circle indicates the in situ product. From these results, the product yield was calculated to be 27%.

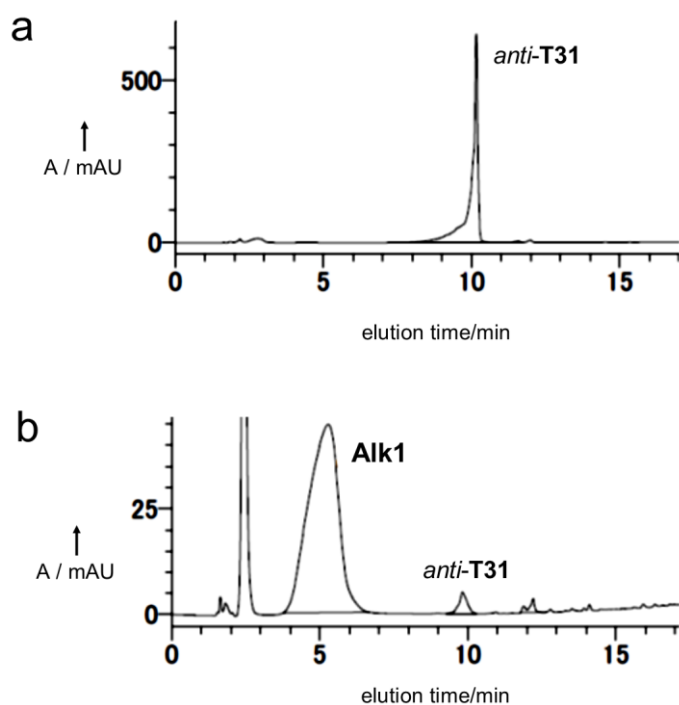

**Figure S5.** HPLC analysis for in situ click products in KDM5C with an excess of  $\text{MnCl}_2$ . (a) Authentic sample of *anti-T31* (10.16 min). (b) Analysis of in situ reaction products in the presence of KDM5C (150 nM) with an excess of  $\text{MnCl}_2$ . The peak corresponding to *anti-T31* was observed (9.82 min). The peak corresponding to **Alk1** was also observed (5.29 min).

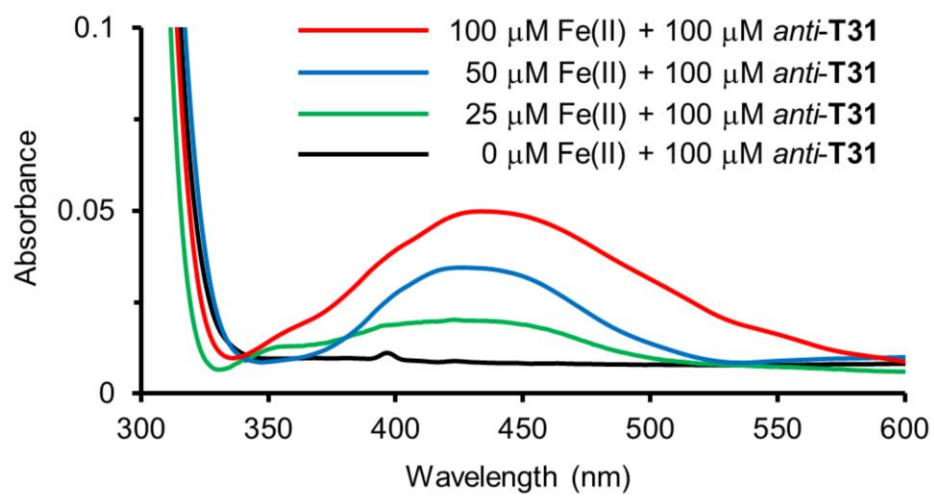

**Figure S6.** UV-vis absorption spectra of *anti-T-31* (100  $\mu\text{M}$ ) in the presence or absence of  $\text{Fe(II)}$  (0, 25, 50, or 100  $\mu\text{M}$ ).

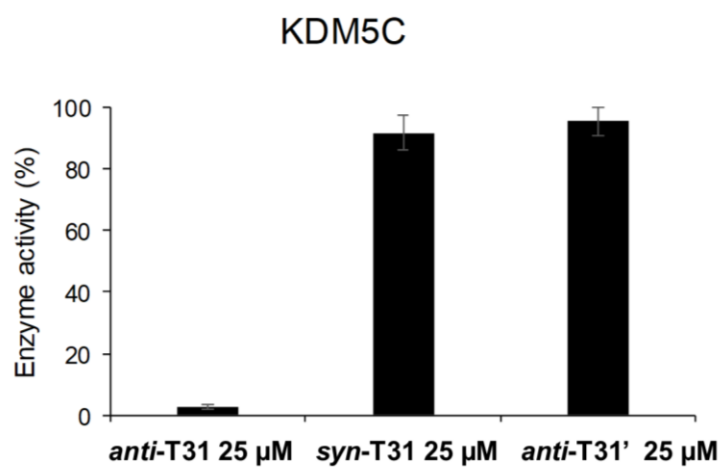

**Figure S7.** Evaluation of KDM5C-inhibitory activities of *anti*-T31, *syn*-T31, and *anti*-T31' (25  $\mu$ M).



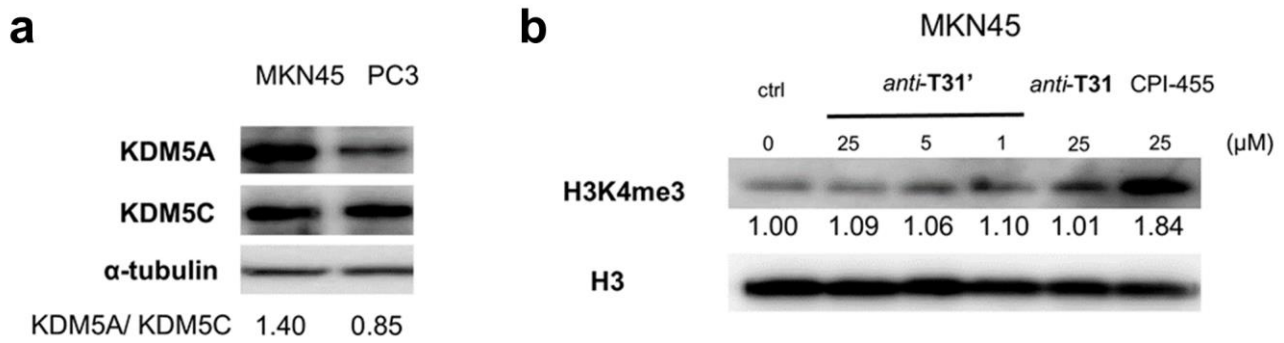

**Figure S8.** Western blot analysis of KDM5A, KDM5C, and H3K4me3. (a) Western blot detection of KDM5A, KDM5C and  $\alpha$ -tubulin in MKN45 and PC3 cells. Values of the KDM5A/KDM5C ratio determined by optical density measurement of the blots are shown. (b) Western blots showing H3K4me3 and H3 levels in MKN45 cells treated with *anti-T31'*, *anti-T31* and CPI-455. The methylation levels were analyzed after 48 h incubation with the inhibitors. Values of the H3K4me3/H3 ratio determined by optical density measurement of the blots are shown.

**Table S1. *In vitro* KDM5C-inhibitory activities of Alk1–3.**

|                                                                                   |                                                                                   |                                                                                   |
|-----------------------------------------------------------------------------------|-----------------------------------------------------------------------------------|-----------------------------------------------------------------------------------|
| 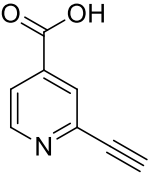 |  |  |
| <b>Alk1</b>                                                                       | <b>Alk2</b>                                                                       | <b>Alk3</b>                                                                       |
| Compound                                                                          | IC <sub>50</sub> (μM)                                                             |                                                                                   |
| <b>Alk1</b>                                                                       | 161±4.00                                                                          |                                                                                   |
| <b>Alk2</b>                                                                       | 386±13.0                                                                          |                                                                                   |
| <b>Alk3</b>                                                                       | 198±0.167                                                                         |                                                                                   |

**Table S2. Azide-alkyne cycloaddition in the presence of (NH<sub>4</sub>)<sub>2</sub>Fe(SO<sub>4</sub>)<sub>2</sub> or MnCl<sub>2</sub>.<sup>a</sup>**

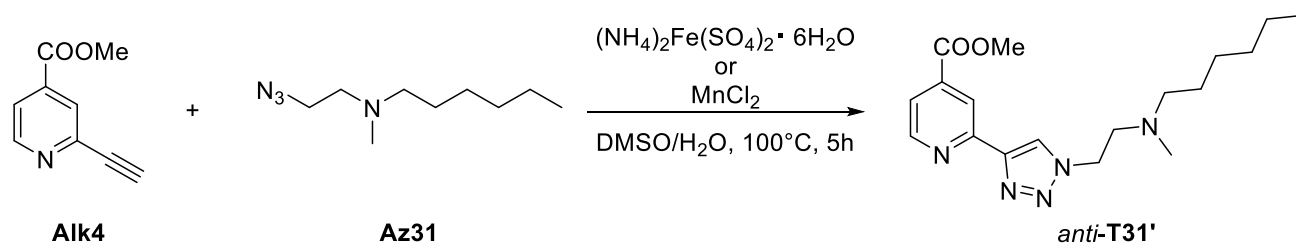

| entry | (NH <sub>4</sub> ) <sub>2</sub> Fe(SO <sub>4</sub> ) <sub>2</sub> (mM) | MnCl <sub>2</sub> (mM) | Yield (%) <sup>a</sup> |
|-------|------------------------------------------------------------------------|------------------------|------------------------|
| 1     | -                                                                      | -                      | 15                     |
| 2     | 2                                                                      | -                      | 13                     |
| 3     | 10                                                                     | -                      | 36                     |
| 4     | 15                                                                     | -                      | 44                     |
| 5     | 20                                                                     | -                      | 52                     |
| 6     | 40                                                                     | -                      | 65                     |
| 7     | -                                                                      | 20                     | 57                     |

<sup>a</sup> The % yields were determined by HPLC analysis.

**Table S3. Alpha screen assay components.**

| Reagents                                          | Supplier      | Code     |
|---------------------------------------------------|---------------|----------|
| HEPES                                             | Nacalai       | 17514-44 |
| Tween20                                           | Nacalai       | 01864-94 |
| BSA                                               | Nacalai       | 28351-85 |
| $\alpha$ -Ketoglutaric acid potassium salt (2-OG) | Sigma         | K2000    |
| Ammonium iron (II) sulfate hexahydrate (Fe(II))   | Sigma         | 215406   |
| (+) Sodium L-ascorbate                            | Sigma         | 11140    |
| KDM2A (FBXL11)                                    | BPS           | 50156    |
| KDM2B (FBXL10)                                    | BPS           | 50120    |
| KDM3A (JMJD1A)                                    | BPS           | 50130    |
| KDM4A (JMJD2A)                                    | BPS           | 50123    |
| KDM4B (JMJD2B)                                    | BPS           | 50104    |
| KDM4C (JMJD2C)                                    | BPS           | 50105    |
| KDM5A (JARID1A)                                   | BPS           | 50110    |
| KDM5B (JARID1B)                                   | BPS           | 50121    |
| KDM5C (JARID1C)                                   | BPS           | 50112    |
| KDM6B (JMJD3)                                     | BPS           | 50115    |
| KDM7B (PHF8)                                      | BPS           | 50131    |
| AlphaLISA anti-H3K4me2-1 acceptor beads           | PerkinElmer   | AL116C   |
| AlphaLISA anti-H3K36me2 acceptor beads            | PerkinElmer   | AL123C   |
| AlphaLISA anti-H3K27me2-1 acceptor beads          | PerkinElmer   | AL121C   |
| AlphaLISA anti-H3K9/27 acceptor beads             | PerkinElmer   | AL138C   |
| Alphascreen Protein A Acceptor beads              | PerkinElmer   | 6760137  |
| Alpha streptavidin donor beads                    | PerkinElmer   | 676002   |
| AlphaLISA 5X Epigenetics Buffer 1 Kit             | PerkinElmer   | AL008    |
| H3(1-21)K4(Me3)-GGK(Biotin)                       | Anaspec, Inc. | AS64192  |
| H3(1-21)-K9(Me2)-GGK(Biotin)                      | Anaspec, Inc. | AS64359  |
| H3(1-21)K9(Me1)-GGK(Biotin)                       | Anaspec, Inc. | AS64358  |
| H3(21-44)-K36(Me3)-GK(Biotin)                     | Anaspec, Inc. | AS64441  |
| H3(21-44)-K27(Me3)-GK(Biotin)                     | Anaspec, Inc. | AS64367  |
| H3(21-44)-K36(Me2)-GK(Biotin)                     | Anaspec, Inc. | AS64442  |
| Anti-H3K9Me1                                      | Abcam         | Ab8896   |
| Anti-H3K36Me1                                     | Abcam         | Ab9048   |

**Table S4. Conditions for Alpha screen assays.**

| Enzyme | [E]/nM | Peptide substrates            | Peptide/ $\mu$ M | Acceptor beads  | Antibody                          |
|--------|--------|-------------------------------|------------------|-----------------|-----------------------------------|
| KDM2A  | 15.0   | H3(21-44)-K36(Me2)-GK(Biotin) | 0.10             | Protein A       | Anti-H3K36Me1<br>(0.4 $\mu$ g/mL) |
| KDM2B  | 20.0   | H3(21-44)-K36(Me2)-GK(Biotin) | 0.10             | Protein A       | Anti-H3K36Me1<br>(0.4 $\mu$ g/mL) |
| KDM3A  | 1.50   | H3(1-21)K9(Me1)-GGK(Biotin)   | 0.10             | anti-H3K9/27    | —                                 |
| KDM4A  | 10.0   | H3(21-44)-K36(Me3)-GK(Biotin) | 0.10             | anti-H3K36me2   | —                                 |
| KDM4B  | 10.0   | H3(21-44)-K36(Me3)-GK(Biotin) | 0.10             | anti-H3K36me2   | —                                 |
| KDM4C  | 10.0   | H3(21-44)-K36(Me3)-GK(Biotin) | 0.10             | anti-H3K36me2   | —                                 |
| KDM5A  | 120    | H3(1-21)K4(Me3)-GGK(Biotin)   | 0.10             | anti-H3K4me2-1  | —                                 |
| KDM5B  | 280    | H3(1-21)K4(Me3)-GGK(Biotin)   | 1.0              | anti-H3K4me2-1  | —                                 |
| KDM5C  | 280    | H3(1-21)K4(Me3)-GGK(Biotin)   | 1.0              | anti-H3K4me2-1  | —                                 |
| KDM6B  | 4.00   | H3(21-44)-K27(Me3)-GK(Biotin) | 0.10             | anti-H3K27me2-1 | —                                 |
| KDM7B  | 20.0   | H3(1-21)K9(Me2)-GGK(Biotin)   | 0.10             | Protein A       | Anti-H3K9Me1<br>(0.4 $\mu$ g/mL)  |

**Table S5. Reagents used for western blotting analysis.**

| Reagents                                          | Supplier                      | Code     | Dilution for probing <sup>a</sup> |
|---------------------------------------------------|-------------------------------|----------|-----------------------------------|
| Primary antibodies                                |                               |          |                                   |
| rabbit polyclonal H3K4me3 antibody                | Abcam                         | ab8580   | 1:5000 dilution                   |
| rabbit polyclonal H3K4me2 antibody                | CST                           | 9725     | 1:5000 dilution                   |
| rabbit polyclonal H3K4me1 antibody                | Abcam                         | ab8895   | 1:5000 dilution                   |
| rabbit polyclonal H3K4me0 antibody                | BPS                           | 25258    | 1:5000 dilution                   |
| rabbit polyclonal H3K9me3 antibody                | Abcam                         | ab8898   | 1:1000 dilution                   |
| rabbit monoclonal H3K27me3 antibody               | Abcam                         | ab192985 | 1:1000 dilution                   |
| rabbit polyclonal H3K36me2 antibody               | Abcam                         | ab9049   | 1:1000 dilution                   |
| rabbit polyclonal histone H3 antibody             | Abcam                         | ab1791   | 1:200000 dilution                 |
| rabbit monoclonal KDM5A antibody                  | CST                           | 3876     | 1:1000 dilution                   |
| rabbit monoclonal KDM5C antibody                  | CST                           | 5361     | 1:1000 dilution                   |
| mouse monoclonal $\alpha$ -tubulin antibody       | sigma                         | T9026    | 1:1000 dilution                   |
| Secondary antibodies                              |                               |          |                                   |
| ECL rabbit IgG, HRP-linked whole antibody         | GE Healthcare<br>Life Science | NA934    | 1:2500 dilution                   |
| ECL mouse IgG, HRP-linked whole antibody          | GE Healthcare<br>Life Science | NA931    | 1:5000 dilution                   |
| HRP Substrate                                     |                               |          |                                   |
| Immobilon™ Western Chemiluminescent HRP Substrate | Millipore                     | P90718   |                                   |

## Chemical synthesis

### General methods.

Melting points were determined using a Yanagimoto micro melting point apparatus or a Büchi 545 melting point apparatus and were left uncorrected. Proton nuclear magnetic resonance spectra ( $^1\text{H}$  NMR: 300 MHz) and carbon nuclear magnetic resonance spectra ( $^{13}\text{C}$  NMR: 75 MHz) were recorded on a Bruker AVANCE300 AV spectrometer in the indicated solvent. Chemical shifts ( $\delta$ ) are reported in parts per million (ppm) relative to the internal standard, tetramethylsilane. Electrospray ionization (ESI) mass spectrometry measurements were performed on a Bruker HCT plus mass spectrometer. Reagents and solvents were purchased from Aldrich, Tokyo Kasei Kogyo, Kishida Kagaku, Kanto Kagaku, Wako Pure Chemical Industries or Nacalai Tesque, and used without purification. Flash column chromatography was performed using silica gel (particle size 200–440 mesh) supplied by Toyotakako Silica Gel (#AP300D). HPLC was performed with a Shimadzu instrument equipped with a COSMOSIL packed column (5C18-AR-II, 4.6 ID  $\times$  150 mm, Nacalai) for analysis and the eluents were water containing 0.1% TFA (A) and MeCN containing 0.1% TFA (B). The conditions for analytical HPLC were as follows; flow rate 1.0 mL/min, detection wavelength 254 nm, gradient A/B 0 to 20 min (90/10 to 10/90), 20 to 30 min (10/90), 30 to 40 min (10/90 to 90/10).

### Synthesis of 2-ethynylisoniconinic acid (Alk1)

#### Scheme S1. Synthesis of Alk1.<sup>a</sup>

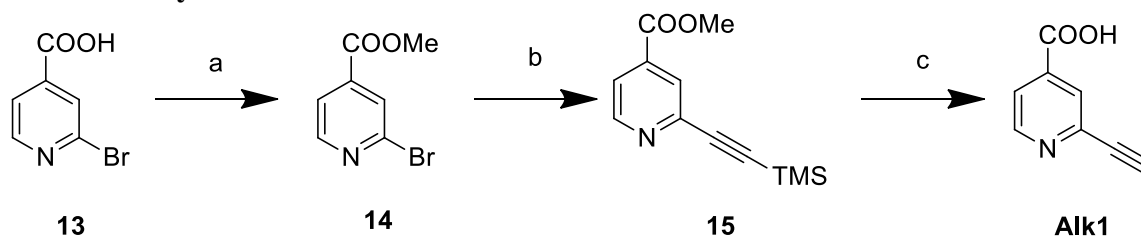

<sup>a</sup> Reagents and conditions: (a) EDCI·HCl,  $\text{CH}_2\text{Cl}_2$ , MeOH, rt, 87%; (b) trimethylsilylacetylene,  $\text{Pd}(\text{PPh}_3)_2\text{Cl}_2$ , CuI,  $\text{Et}_3\text{N}$ , MeCN, rt, 70%; (c) NaOH,  $\text{H}_2\text{O}$ , MeOH, rt, 93%.

#### Step 1. Preparation of methyl 2-bromoisonicotinate (**14**).

To a solution of 2-bromoisonicotinic acid **13** (1.46 g, 7.23 mmol) in  $\text{CH}_2\text{Cl}_2$  (10.0 mL) and MeOH (15.0 mL) was added EDCI·HCl (1.36 g, 7.20 mmol) at 0 °C. The mixture was stirred for 20 h at room temperature, then concentrated in vacuo, and the residue was purified by silica gel flash column chromatography ( $\text{AcOEt}/n\text{-hexane}$  = 1/10) to give 1.35 g (87%) of **14** as colorless crystals:  $^1\text{H}$  NMR ( $\text{CDCl}_3$ , 300 MHz,  $\delta$ ; ppm) 8.52 (1H, dd,  $J$  = 4.2, 0.6 Hz), 8.02 (1H, t,  $J$  = 6.6 Hz), 7.80 (1H, dd,  $J$  = 3.9, 0.6 Hz), 3.97 (3H, s);  $^{13}\text{C}$  NMR ( $\text{CDCl}_3$ , 75 MHz,  $\delta$ ; ppm) 151.0, 144.3, 141.2, 129.2, 123.3, 54.40; MS (ESI)  $m/z$  215.7, 217.7 ( $\text{MH}^+$ ).

*Step 2: Preparation of 4-trimethylsilylethynylpyridine-2-carboxylic acid methyl ester (15).*

To a solution of **14** (216 mg, 1.00 mmol), PdCl<sub>2</sub>(PPh<sub>3</sub>)<sub>2</sub> (36.0 mg, 51.2 μmol) and CuI (19.0 mg, 100 μmol) in Et<sub>3</sub>N (200 μL) and MeCN (2.00 mL) was added (trimethylsilyl)acetylene (165 μL, 1.17 mmol) under argon. The mixture was stirred for 3 h at room temperature, then concentrated in vacuo, and the residue was diluted with Et<sub>2</sub>O. Insoluble materials were removed by filtration. The filtrate was concentrated in vacuo and the residue was purified by silica gel flash column chromatography (AcOEt/*n*-hexane = 1/10) to give 102 mg (70%) of **15** as a yellow oil: <sup>1</sup>H NMR (CDCl<sub>3</sub>, 300 MHz, δ; ppm) 8.68 (1H, dd, *J* = 4.2, 0.6 Hz), 7.97 (1H, s), 7.73 (1H, dd, *J* = 4.2, 0.6 Hz), 3.93 (3H, s), 0.26 (9H, s); <sup>13</sup>C NMR (CDCl<sub>3</sub>, 75 MHz, δ; ppm) 151.0, 144.3, 138.2, 127.1, 122.6, 103.5, 96.86, 53.35, 0.18; MS (ESI) *m/z* 233.8 (MH<sup>+</sup>).

*Step 3: Preparation of 2-ethynylisonicotinic acid (Alk1).*

To a solution of **15** (50.0 mg, 215 μmol) in MeOH (2.00 mL) was added 2 N aqueous NaOH (236 μL, 472 μmol) at 0 °C. The mixture was stirred for 12 h at room temperature, then acidified to pH 4.0 with saturated aqueous citric acid solution. The precipitate was collected by filtration, washed with water, and dried in vacuo. The crude solid was recrystallized from MeOH/AcOEt = 2/1 to give 29.4 mg (93%) of **Alk1** as a pale white solid: mp 203–205 °C; <sup>1</sup>H NMR (DMSO-*d*<sub>6</sub>, 300 MHz, δ; ppm) 8.75 (1H, dd, *J* = 5.1, 0.9 Hz), 7.87–7.88 (1H, m), 7.81 (1H, dd, *J* = 4.8, 1.5 Hz), 4.45 (1H, s); <sup>13</sup>C NMR (DMSO-*d*<sub>6</sub>, 75 MHz, δ; ppm) 165.0, 151.0, 143.4, 137.9, 126.1, 122.8, 82.64, 81.05; HRMS (EI) calcd. for C<sub>8</sub>H<sub>5</sub>NO<sub>2</sub> 147.0320, found 147.0310.; Anal. calcd. for C<sub>8</sub>H<sub>5</sub>NO<sub>2</sub>: C, 65.31; H, 3.43; N, 9.52. found: C, 64.91; H, 3.60; N, 9.28.

**Synthesis of 4-[*N*-(methanesulfonyl)]-2-ethynylpyridinecarboxamide (Alk2).**

**Scheme S2. Synthesis of Alk2.<sup>a</sup>**

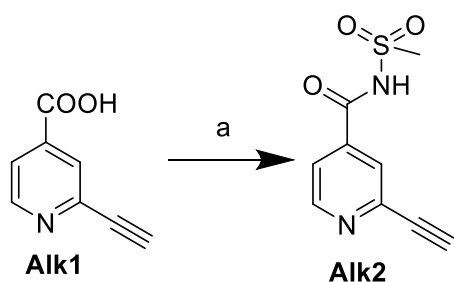

<sup>a</sup> Reagents and conditions: (a) methanesulfonamide, DMAP, EDCI·HCl, CH<sub>2</sub>Cl<sub>2</sub>, rt, 26%.

To a solution of **Alk1** (147 mg, 1.00 mmol), EDCI·HCl (388 mg, 2.00 mmol), and DMAP (244 mg, 2.00 mmol) in CH<sub>2</sub>Cl<sub>2</sub> (15.0 mL) was added methyl sulfonamide (189 mg, 2.00 mmol). The mixture was stirred for 24 h at room temperature, then the reaction was quenched with water. The aqueous layer was acidified with 1 N aqueous HCl solution and extracted with CH<sub>2</sub>Cl<sub>2</sub>. The organic layer was washed with H<sub>2</sub>O, dried over Na<sub>2</sub>SO<sub>4</sub>, filtered, and concentrated in vacuo. The



residue was purified by silica gel flash column chromatography (CH<sub>2</sub>Cl<sub>2</sub>/methanol = 10/1) to give 56 mg (26%) of **Alk2** as a dark brown solid: mp 141–142 °C; <sup>1</sup>H NMR (DMSO-*d*<sub>6</sub>, 300 MHz, δ; ppm) 8.76 (1H, dd, *J* = 4.5, 0.9 Hz), 8.00 (1H, q, *J* = 0.9 Hz), 7.82 (1H, dd, *J* = 3.6, 1.5 Hz), 4.50 (1H, s), 3.38 (3H, s); <sup>13</sup>C NMR (DMSO-*d*<sub>6</sub>, 75 MHz, δ; ppm) 164.6, 151.0, 142.4, 140.0, 125.4, 121.9, 82.41, 81.39, 41.16; MS (ESI) *m/z* 225.1 (MH<sup>+</sup>); HRMS (EI) calcd. for C<sub>9</sub>H<sub>8</sub>N<sub>2</sub>O<sub>3</sub> 224.0256, found 224.0256; HPLC *t*<sub>R</sub> = 7.58 min, purity 96.5%.

### Synthesis of 4-(2H-tetrazol-5-yl)-pyridine (**Alk3**).

#### Scheme S3. Synthesis of **Alk3**.<sup>a</sup>

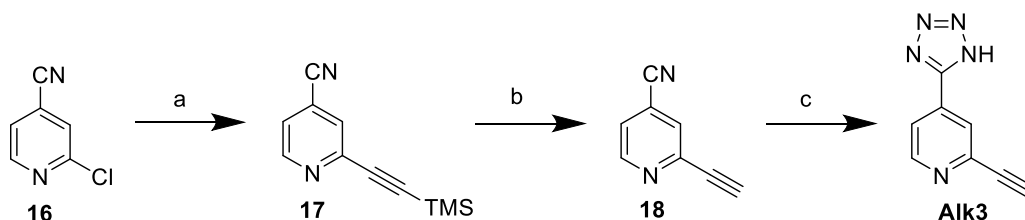

<sup>a</sup> Reagents and conditions: (a) trimethylsilylacetylene, Pd(Ph<sub>3</sub>)<sub>2</sub>Cl<sub>2</sub>, CuI, Et<sub>3</sub>N, MeCN, 60 °C, 98%; (b) TBAF, THF, CH<sub>2</sub>Cl<sub>2</sub>, 0 °C, 66%; (c) NaN<sub>3</sub>, NH<sub>4</sub>Cl, DMF, 80 °C, 12%.

#### Step 1: Preparation of 4-cyano-2-[2-(trimethylsilyl)ethynyl]pyridine (**17**).

Compound **17** was prepared from 2-chloro-4-cyanopyridine **16** by using a similar procedure to that described for the preparation of **Alk1** (Step 2), except for the following changes: reaction temperature, 60 °C, silica gel flash column chromatography (AcOEt/*n*-hexane = 1/10): Yield, 1.96 g (98%); a pale yellow solid; mp 46.0–48.0 °C; <sup>1</sup>H NMR (CDCl<sub>3</sub>, 300 MHz, δ; ppm) 8.75 (1H, dd, *J* = 4.2, 0.9 Hz), 7.67 (1H, q, *J* = 0.3 Hz), 7.44 (1H, dd, *J* = 3.6, 1.5 Hz), 0.30 (9H, s); <sup>13</sup>C NMR (CDCl<sub>3</sub>, 75 MHz, δ; ppm) 151.0, 144.6, 128.7, 124.2, 121.0, 115.9, 101.8, 98.78, 0.36; MS (ESI) *m/z* 201.1 (MH<sup>+</sup>).

#### Step 2: Preparation of 4-cyano-2-ethynylpyridine (**18**).

To a solution of **17** (1.96 g, 9.79 mmol) in CH<sub>2</sub>Cl<sub>2</sub> (25.0 mL) was added 1 M TBAF in THF (14.0 mL, 14.0 mmol) at 0 °C. The reaction mixture was stirred for 2 h at 0 °C, then the reaction was quenched with water. The organic layer was separated, washed with water, dried over Na<sub>2</sub>SO<sub>4</sub>, filtered, and concentrated in vacuo. The residue was purified by silica gel flash column chromatography (AcOEt/*n*-hexane = 1/3) to give 823 mg of **18** (66%) as a pale yellow solid: mp 104–106 °C; <sup>1</sup>H NMR (CDCl<sub>3</sub>, 300 MHz, δ; ppm) 8.76 (1H, dd, *J* = 4.2, 0.9 Hz), 7.68 (1H, q, *J* = 0.3 Hz), 7.49 (1H, dd, *J* = 3.6, 1.5 Hz), 3.32 (1H, s); <sup>13</sup>C NMR (CDCl<sub>3</sub>, 75 MHz, δ; ppm) 151.1, 143.8, 128.8, 124.7, 121.1, 115.7, 81.10, 80.05; MS (ESI) *m/z* 129.2 (MH<sup>+</sup>).

#### Step 3: Preparation of 4-(2H-tetrazol-5-yl)pyridine (**Alk3**).

To a solution of **18** (396 mg, 3.00 mmol) in anhydrous DMF (20.0 mL) was added NaN<sub>3</sub> (195 mg, 3.00 mmol) and NH<sub>4</sub>Cl (162 mg, 3.00 mmol) under nitrogen. The mixture was stirred for 12 h at

80 °C under nitrogen, then cooled to room temperature, diluted with AcOEt, and washed with 4 N aqueous HCl solution twice. The organic layer was separated, washed with water and brine, dried over Na<sub>2</sub>SO<sub>4</sub>, filtered, and concentrated in vacuo. The residue was purified by silica gel flash column chromatography (AcOEt/*n*-hexane = 2/1) to give 62.0 mg (12%) of **Alk3** as a brown solid: mp 210–212 °C; <sup>1</sup>H NMR (DMSO-*d*<sub>6</sub>, 300 MHz, δ; ppm) 8.79 (1H, dd, *J* = 4.2, 0.9 Hz), 8.10 (1H, q, *J* = 0.6 Hz), 8.00 (1H, dd, *J* = 3.3, 1.8 Hz), 4.51 (1H, s); <sup>13</sup>C NMR (DMSO-*d*<sub>6</sub>, 75 MHz, δ; ppm) 154.7, 151.5, 142.7, 132.9, 124.1, 120.7, 82.35, 81.41; MS (ESI) *m/z* 172.1 (MH<sup>+</sup>); HRMS (EI) calcd. for C<sub>8</sub>H<sub>5</sub>N<sub>5</sub> 171.0537, found 171.0545; HPLC *t*<sub>R</sub> = 7.45 min, purity 96.0%.

### Synthesis of azides **Az31–37**.

#### Scheme S4. Synthesis of **Az31–37**.<sup>a</sup>

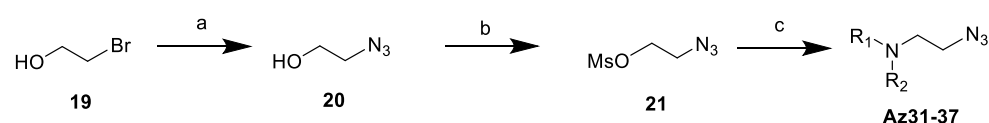

<sup>a</sup> Reagents and conditions: (a) NaN<sub>3</sub>, H<sub>2</sub>O, reflux; (b) MsCl, Et<sub>3</sub>N, CH<sub>2</sub>Cl<sub>2</sub>, rt, 34%; (c) amine, K<sub>2</sub>CO<sub>3</sub>, MeCN, reflux, 16–53%.

#### Step 1: Preparation of 2-azidoethanol (**20**).

To a solution of 2-bromoethanol **19** (581 μL, 8.1 mmol) in water (5.00 mL) was added NaN<sub>3</sub> (647 mg, 10.0 mmol). The mixture was stirred for 12 h at 100 °C, then cooled to room temperature, and saturated with solid NaCl. The resulting mixture was extracted with Et<sub>2</sub>O. The organic layer was dried over Na<sub>2</sub>SO<sub>4</sub>, filtered, and concentrated in vacuo to give compound **20** as a crude product. This was used in the next reaction without further purification.

#### Step 2: Preparation of 1-mesyloxy-2-azidoethanol (**21**).

To a solution of crude **20** in dry CH<sub>2</sub>Cl<sub>2</sub> (10.0 mL) were successively added Et<sub>3</sub>N (1.74 mL, 12.5 mmol) and methanesulfonyl chloride (967 μL, 12.5 mmol) at 0 °C. The mixture was stirred for 12 h at room temperature, filtered, and concentrated in vacuo. The residue was purified by silica gel flash column chromatography (AcOEt/*n*-hexane = 2/3) to give 560 mg of **21** (34%) as colorless oil: <sup>1</sup>H NMR (CDCl<sub>3</sub>, 300 MHz, δ; ppm) 4.26 (2H, t, *J* = 5.7 Hz), 3.52 (2H, t, *J* = 4.5 Hz), 3.01 (3H, s); <sup>13</sup>C NMR (CDCl<sub>3</sub>, 75 MHz, δ; ppm) 67.88, 49.55, 37.17.

#### Step 3: Preparation of 2-azido-1-ethylhexylmethylamine (**Az31**).

To a suspension of **21** (189 mg, 1.15 mmol) and K<sub>2</sub>CO<sub>3</sub> (482 mg, 3.50 mmol) in MeCN (5 mL) was added *N*-ethylhexylmethylamine (151 μL, 1.00 mmol). The mixture was stirred for 12 h at 90 °C, then filtered, and the filtrate was concentrated in vacuo. The residue was purified by silica gel flash column chromatography (AcOEt/*n*-hexane = 1/3) to give 50.0 mg of **Az31** (27%) as a colorless oil: <sup>1</sup>H NMR (CDCl<sub>3</sub>, 300 MHz, δ; ppm) 3.32 (2H, t, *J* = 6.0 Hz), 2.58 (2H, t, *J* = 6.0

Hz), 2.37 (2H, t,  $J = 7.8$  Hz), 2.26 (3H, s), 1.42–1.49 (2H, m), 1.26–1.32 (6H, m), 0.89 (3H, t,  $J = 6.6$  Hz);  $^{13}\text{C}$  NMR ( $\text{CDCl}_3$ , 75 MHz,  $\delta$ ; ppm) 58.14, 56.52, 49.16, 42.34, 31.91, 27.36, 27.16, 22.74, 14.14; MS (ESI)  $m/z$  185.1 ( $\text{MH}^+$ ); HRMS (EI) calcd. for  $\text{C}_9\text{H}_{20}\text{N}_4$  185.1764, found 185.1761; HPLC  $t_R = 10.2$  min, purity 97.6%.

Azides **Az32–37** were prepared from the corresponding amines using the same procedure described for **Az31**.

*2-Azido-1-benzylmethylethylamine (Az32).*

Yield 53%; a colorless oil.  $^1\text{H}$  NMR ( $\text{CDCl}_3$ , 300 MHz,  $\delta$ ; ppm): 7.28–7.40 (5H, m), 3.61 (2H, s), 3.36 (2H, t,  $J = 6.0$  Hz), 2.69 (2H, t,  $J = 6.0$  Hz), 2.31 (3H, s);  $^{13}\text{C}$  NMR ( $\text{CDCl}_3$ , 75 MHz,  $\delta$ ; ppm): 138.7, 128.9, 128.3, 127.2, 62.57, 56.26, 48.90, 42.15; MS (ESI)  $m/z$  191.2 ( $\text{MH}^+$ ). HPLC  $t_R = 7.87$  min, purity 96.2%.

*2-Azido-1-diethylbutylamine (Az33).*

Yield 24%; a colorless oil.  $^1\text{H}$  NMR ( $\text{CDCl}_3$ , 300 MHz,  $\delta$ ; ppm): 3.28 (2H, t,  $J = 6.3$  Hz), 2.66 (2H, t,  $J = 6.3$  Hz), 2.55 (2H, q,  $J = 6.9$  Hz), 2.46 (2H, t,  $J = 7.8$  Hz), 1.31–1.44 (4H, m), 1.04 (3H, t,  $J = 0.9$  Hz), 0.93 (3H, t,  $J = 7.2$  Hz);  $^{13}\text{C}$  NMR ( $\text{CDCl}_3$ , 75 MHz,  $\delta$ ; ppm): 53.60, 52.85, 49.51, 47.81, 29.37, 20.55, 14.02, 11.80; MS (ESI)  $m/z$  171.3 ( $\text{MH}^+$ ). HPLC  $t_R = 22.9$  min, purity 95.8%.

*2-Azido-1-ethylpentylmethylamine (Az34).*

Yield 37%; a colorless oil.  $^1\text{H}$  NMR ( $\text{CDCl}_3$ , 300 MHz,  $\delta$ ; ppm): 3.32 (2H, t,  $J = 6.3$  Hz), 2.57 (2H, t,  $J = 6.0$  Hz), 2.36 (2H, t,  $J = 6.0$  Hz), 2.26 (3H, s), 1.42–1.52 (2H, m), 1.28–1.32 (4H, m), 0.90 (3H, t,  $J = 7.2$  Hz);  $^{13}\text{C}$  NMR ( $\text{CDCl}_3$ , 75 MHz,  $\delta$ ; ppm): 57.95, 56.38, 49.00, 42.18, 29.52, 26.92, 22.57, 14.00; MS (ESI)  $m/z$  171.3 ( $\text{MH}^+$ ). HPLC  $t_R = 22.7$  min, purity 98.5%.

*2-Azido-1-ethylpropylbutylamine (Az35).*

Yield 36%; a colorless oil.  $^1\text{H}$  NMR ( $\text{CDCl}_3$ , 300 MHz,  $\delta$ ; ppm): 3.25 (2H, t,  $J = 6.0$  Hz), 2.65 (2H, t,  $J = 6.3$  Hz), 2.39–2.47 (4H, m), 1.30–1.50 (6H, m), 0.89 (6H, q,  $J = 7.2$  Hz);  $^{13}\text{C}$  NMR ( $\text{CDCl}_3$ , 75 MHz,  $\delta$ ; ppm): 56.49, 54.20, 53.56, 49.54, 29.38, 20.52, 20.38, 14.01, 11.76; MS (ESI)  $m/z$  185.3 ( $\text{MH}^+$ ). HPLC  $t_R = 10.2$  min, purity 97.6%.

*2-Azido-1-ethyldibutylamine (Az36).*

Yield 48%; a colorless oil.  $^1\text{H}$  NMR ( $\text{CDCl}_3$ , 300 MHz,  $\delta$ ; ppm): 3.25 (2H, t,  $J = 6.3$  Hz), 2.63 (2H, t,  $J = 6.3$  Hz), 2.44 (4H, t,  $J = 7.2$  Hz), 1.30–1.43 (8H, m), 0.92 (6H, t,  $J = 7.2$  Hz);  $^{13}\text{C}$  NMR ( $\text{CDCl}_3$ , 75 MHz,  $\delta$ ; ppm): 54.19, 53.52, 49.53, 29.39, 20.51, 13.99; MS (ESI)  $m/z$  199.3 ( $\text{MH}^+$ ). HPLC  $t_R = 9.15$  min, purity 99.9%.

*2-Azido-1-ethylbutylbenzylamine (Az37).*

Yield 16%; a colorless oil.  $^1\text{H}$  NMR ( $\text{CDCl}_3$ , 300 MHz,  $\delta$ ; ppm): 7.25–7.39 (5H, m), 3.65 (2H, s), 3.26 (2H, t,  $J = 6.0$  Hz), 2.71 (2H, t,  $J = 6.3$  Hz), 2.51 (2H, t,  $J = 7.2$  Hz), 1.47–1.57 (2H, m), 1.29–1.41 (2H, m), 0.92 (3H, t,  $J = 7.2$  Hz);  $^{13}\text{C}$  NMR ( $\text{CDCl}_3$ , 75 MHz,  $\delta$ ; ppm): 139.5, 128.7, 128.2, 127.0, 59.09, 54.13, 53.31, 49.43, 29.29, 20.44, 14.01; MS (ESI)  $m/z$  233.3 ( $\text{MH}^+$ ). HPLC  $t_R = 11.1$  min, purity 96.3%.

**Synthesis of 2-Azido-1-ethylbutylhexylamine (Az38).**

**Scheme S5. Synthesis of Az38.<sup>a</sup>**

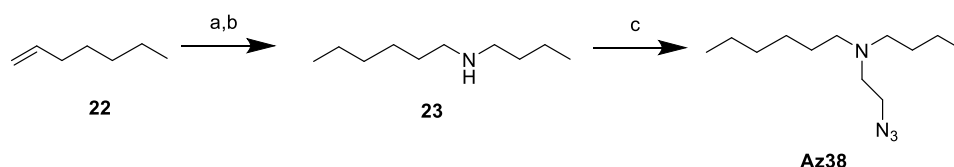

<sup>a</sup> Reagents and conditions: (a)  $\text{BH}_3\cdot\text{SMe}_2$ , rt ; (b) sodium hypochlorite, *N*-butylamine, THF, 0 °C , 41%; (c) **21**,  $\text{K}_2\text{CO}_3$ , MeCN, reflux, 46%.

*Step 1: Preparation of N-butyl-1-hexanamine (23).*

A solution of  $\text{BH}_3\cdot\text{SMe}_2$  (1.00 mL, 10.0 mmol) was added dropwise to 1-hexene (5.00 mL, 40.0 mmol) at 0 °C under nitrogen. The mixture was warmed to room temperature and stirred for 12 h to obtain a solution of trialkylborane. A solution of sodium hypochlorite (18.4 mL, 10.0 mmol) was added dropwise to a solution of *N*-butylamine (1.00 mL, 10.0 mmol) in THF (10.0 mL) at 0 °C under nitrogen. This mixture was added quickly to the solution of trialkylborane at 0 °C. The reaction mixture was warmed to room temperature and stirred for 3 h, then acidified to pH 1.0 with 10% aqueous HCl solution, and washed with  $\text{Et}_2\text{O}$ . The free amine was obtained by adding 6 N aqueous NaOH solution to the aqueous layer (pH >13) and extracted with  $\text{Et}_2\text{O}$ . The organic layer was dried over  $\text{Na}_2\text{SO}_4$  and concentrated to give 650 mg of **23** (41%) as a colorless oil:  $^1\text{H}$  NMR ( $\text{CDCl}_3$ , 300 MHz,  $\delta$ ; ppm) 2.56 (2H, t,  $J = 7.2$  Hz), 2.56 (1H, t,  $J = 7.5$  Hz), 1.26–1.47 (12H, m), 0.83–0.99 (6H, m);  $^{13}\text{C}$  NMR ( $\text{CDCl}_3$ , 75 MHz,  $\delta$ ; ppm) 50.16, 49.81, 32.32, 31.79, 30.15, 27.09, 22.60, 20.52, 14.00; MS (ESI)  $m/z$  158.3 ( $\text{MH}^+$ ).

*Step 2: Preparation of 2-azido-1-ethylbutylhexylamine(Az38).*

Compound **Az38** was prepared from compound **23** by using a similar procedure to that described for the preparation of **Az31** (Step 3): Yield, 104 mg (46%); a colorless oil;  $^1\text{H}$  NMR ( $\text{CDCl}_3$ , 300 MHz,  $\delta$ ; ppm): 3.26 (2H, t,  $J = 6.0$  Hz), 2.64 (2H, t,  $J = 6.3$  Hz), 2.44 (2H, t,  $J = 7.2$  Hz), 2.44 (2H, t,  $J = 7.2$  Hz), 1.40–1.45 (4H, m), 1.27–1.32 (8H, m), 0.87–0.94 (6H, m);  $^{13}\text{C}$  NMR ( $\text{CDCl}_3$ , 75 MHz,  $\delta$ ; ppm): 54.67, 54.35, 53.64, 49.68, 31.96, 29.50, 27.29, 27.24, 22.80, 20.70, 14.19; MS (ESI)  $m/z$  227.3 ( $\text{MH}^+$ ); HPLC  $t_R = 13.3$  min, purity 98.3%

## Synthesis of 2-ethynylisonicotinate (**Alk4**).

### Scheme S6. Synthesis of **Alk4**.<sup>a</sup>

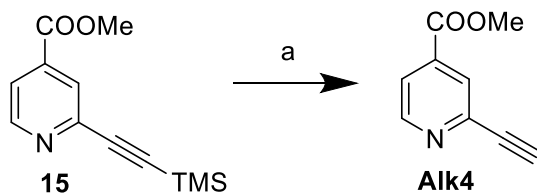

<sup>a</sup> Reagents and conditions: (a) TBAF, THF, 0 °C, 96%

Compound **Alk4** was prepared from 2-chloro-4-cyanopyridine **16** by using a similar procedure to that described for the preparation of **Alk1** (Step 2), except for the following changes: reaction temperature, 0 °C, silica gel flash column chromatography (AcOEt/*n*-hexane = 1/2): Yield 248 mg (96%); a colorless solid; mp 64.5–65.5 °C; <sup>1</sup>H NMR (CDCl<sub>3</sub>, 300 MHz, δ; ppm) 8.75 (1H, d, *J* = 5.1 Hz), 8.03 (1H, q, *J* = 0.6 Hz), 7.81 (1H, dd, *J* = 4.2, 0.9 Hz), 3.97 (3H, s), 3.23 (1H, s); <sup>13</sup>C NMR (CDCl<sub>3</sub>, 75 MHz, δ; ppm) 165.0, 151.0, 143.4, 137.9, 126.8, 122.6, 82.21, 78.37, 53.00; MS (ESI) *m/z* 162.2 (MH<sup>+</sup>); HPLC *t*<sub>R</sub> = 11.7 min, purity 99.4%.

## Synthesis of 2-(1-(2-(hexyl(methyl)amino)ethyl)-1*H*-1,2,3-triazol-4-yl)isonicotinic acid (*anti*-**T31**) and 2-(1-(2-(hexyl(methyl)amino)ethyl)-1*H*-1,2,3-triazol-5-yl)isonicotinic acid (*syn*-**T31**)

### Scheme 7. Synthesis of *anti*-**T31** and *syn*-**T31**.<sup>a</sup>

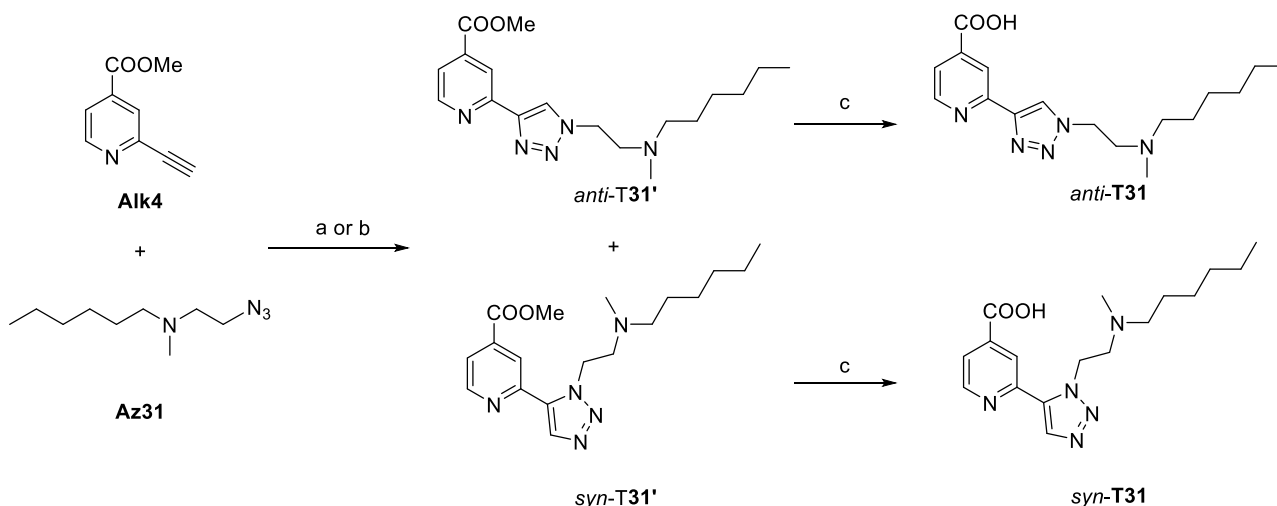

<sup>a</sup> Reagents and conditions: (a) CuSO<sub>4</sub>·5H<sub>2</sub>O, sodium ascorbate, TBTA, *tert*-BuOH, rt, 47% (*anti*-**T31'**); (b) toluene, 100 °C, 26% (*anti*-**T31'**), 29% (*syn*-**T31'**); (c) NaOH, H<sub>2</sub>O, MeOH, rt, 21% (*anti*-**T31**), 29% (*syn*-**T31**).

## Synthesis of *anti*-**T31**

### *Step 1: Preparation of methyl 2-(1-(2-(hexyl(methyl)amino)ethyl)-1H-1,2,3-triazol-4-yl)isonicotinate (anti-T31')*

To a suspension of **Alk4** (16.2 mg, 100  $\mu$ mol) and **Az31** (18.3 mg, 100  $\mu$ mol) in *tert*-BuOH (2.50 mL) and H<sub>2</sub>O (2.50 mL) were added CuSO<sub>4</sub>·5H<sub>2</sub>O (25.0 mg, 100  $\mu$ mol), sodium ascorbate (20.0 mg, 100  $\mu$ mol). The mixture was stirred for 12 h at room temperature, then concentrated in vacuo. The residue was poured into water and extracted with AcOEt. The organic layer was washed with brine, dried over Na<sub>2</sub>SO<sub>4</sub>, filtered and concentrated in vacuo. The residue was purified by silica gel flash column chromatography (AcOEt/*n*-hexane = 1/3 to CH<sub>2</sub>Cl<sub>2</sub>/MeOH = 5/1) to give 16.2 mg of *anti*-**T31'** (47%) as an orange oil; <sup>1</sup>H NMR (CDCl<sub>3</sub>, 300 MHz,  $\delta$ ; ppm) 8.71–8.74 (2H, m), 8.30 (1H, s), 7.78 (1H, dd, *J* = 3.6, 0.6 Hz), 4.52 (2H, t, *J* = 6.3 Hz), 3.99 (3H, s), 2.88 (2H, t, *J* = 6.0 Hz), 2.40 (2H, t, *J* = 7.5 Hz), 2.31 (3H, s), 1.22–1.42 (8H, m), 0.83 (3H, t, *J* = 6.6 Hz); <sup>13</sup>C NMR (CDCl<sub>3</sub>, 75 MHz,  $\delta$ ; ppm) 165.6, 151.7, 150.2, 147.5, 138.4, 123.3, 121.7, 119.5, 57.98, 57.03, 52.70, 48.57, 42.09, 31.75, 27.21, 27.02, 22.63, 14.02; MS (ESI) *m/z* 346.4 (MH<sup>+</sup>); HRMS(EI) calcd. for C<sub>18</sub>H<sub>27</sub>N<sub>5</sub>O<sub>2</sub> 345.2165, found 346.2237 (MH<sup>+</sup>); HPLC *t*<sub>R</sub> = 12.13 min, purity 95.6%.

### *Step 2: Preparation of 2-(1-(2-(hexyl(methyl)amino)ethyl)-1H-1,2,3-triazol-4-yl)isonicotinic acid hydrochloride (anti-T31)*

To a solution of *anti*-**T31'** (16.2 mg, 47.0  $\mu$ mol) in MeOH (3.00 mL) was added 2.00 mL of 2 N aqueous NaOH solution. The reaction mixture was stirred for 12 h at room temperature, then acidified to pH 1.0 by adding 1 N HCl. The precipitate was collected by filtration and the filtrate was concentrated in vacuo to give 10.0 mg of *anti*-**T31** (HCl salt) as a colorless solid (25%): <sup>1</sup>H NMR (CD<sub>3</sub>OD, 300 MHz,  $\delta$ ; ppm) 8.79 (1H, d, *J* = 4.5 Hz), 8.64 (1H, s), 8.61 (1H, s), 7.89 (1H, dd, *J* = 3.6, 1.5 Hz), 4.99 (2H, t, *J* = 6.0 Hz), 3.92 (2H, s), 3.30 (2H, s), 3.02 (3H, s), 1.73 (2H, quin., *J* = 7.8 Hz), 1.38 (6H, m), 0.93 (3H, t, *J* = 7.2 Hz); <sup>13</sup>C NMR (CD<sub>3</sub>OD, 75 MHz,  $\delta$ ; ppm) 166.0, 150.5, 150.2, 147.6, 139.8, 124.0, 122.4, 119.4, 56.67, 54.24, 44.53, 39.71, 30.92, 25.73, 23.56, 22.03, 12.79; MS (ESI) *m/z* 332.1 (MH<sup>+</sup>-HCl); HRMS (EI) calcd. for C<sub>17</sub>H<sub>25</sub>N<sub>5</sub>O<sub>2</sub> 331.2008, found 331.2041; HPLC *t*<sub>R</sub> = 10.10 min, purity 99.6%.

## Synthesis of *syn*-**T31**.

### *Step 1: Preparation of methyl 2-(1-(2-(hexyl(methyl)amino)ethyl)-1H-1,2,3-triazol-5-yl)isonicotinate (syn-T31')*

A solution of **Alk4** (123 mg, 0.760 mmol) and **Az31** (210 mg, 1.14 mmol) in 5.00 mL of toluene was stirred at 100 °C for 30 h. The reaction mixture was concentrated in vacuo and the residue was purified by silica gel flash column chromatography (AcOEt/*n*-hexane = 1/1 to AcOEt only) to give 76.0 mg of *syn*-**T31'** (29%) as a yellow oil and 68.0 mg of *anti*-**T31'** (26%) as an orange oil.

*syn-T31'*:  $^1\text{H}$  NMR ( $\text{CDCl}_3$ , 300 MHz,  $\delta$ ; ppm) 8.79 (1H, dd,  $J = 4.2, 0.9$  Hz), 8.12 (1H, t,  $J = 0.9$  Hz), 8.02 (1H, s), 7.80 (1H, dd,  $J = 3.6, 1.5$  Hz), 4.97 (2H, t,  $J = 7.2$  Hz), 3.96 (3H, s), 2.83 (2H, t,  $J = 7.2$  Hz), 2.32 (2H, t,  $J = 7.2$  Hz), 2.22 (3H, s), 1.15–1.29 (8H, m), 0.82 (3H, t,  $J = 7.2$  Hz);  $^{13}\text{C}$  NMR ( $\text{CDCl}_3$ , 75 MHz,  $\delta$ ; ppm) 164.9, 150.5, 148.4, 138.7, 135.3, 133.8, 122.2, 122.0, 57.75, 56.84, 53.02, 47.80, 42.34, 31.76, 27.14, 26.98, 22.64, 14.07; MS (ESI)  $m/z$  346.4 ( $\text{MH}^+$ ); HPLC  $t_R = 12.65$  min, purity 95.6%.

*Step 2: Preparation of 2-(1-(2-(hexyl(methyl)amino)ethyl)-1H-1,2,3-triazol-5-yl)isonicotinic acid (syn-T31)*

To a solution of *syn-T31'* (50.0 mg, 145  $\mu\text{mol}$ ) in MeOH (3.00 mL) was added 2.00 mL of 2 N NaOH aq.. The reaction mixture was stirred for 12 h at room temperature, then acidified to pH 4.0 by adding citric acid, and extracted with AcOEt. The organic layer was washed with water and brine, dried over  $\text{Na}_2\text{SO}_4$ , filtered and concentrated in vacuo to give 13.9 mg of *syn-T31* as a yellow oil (29%).

*syn-T31*:  $^1\text{H}$  NMR ( $\text{CD}_3\text{OD}$ , 300 MHz,  $\delta$ ; ppm) 8.92 (1H, dd,  $J = 4.5, 0.6$  Hz), 8.43 (1H, s), 8.40 (1H, t,  $J = 0.3$  Hz), 7.97 (1H, dd,  $J = 3.6, 1.5$  Hz), 5.36 (2H, t,  $J = 6.0$  Hz), 3.92 (2H, s), 3.29 (2H, t,  $J = 8.4$  Hz), 3.05 (3H, s), 1.75 (2H, quin.,  $J = 8.1$  Hz), 1.37 (6H, m), 0.93 (3H, t,  $J = 7.2$  Hz);  $^{13}\text{C}$  NMR ( $\text{CD}_3\text{OD}$ , 75 MHz,  $\delta$ ; ppm) 167.0, 151.8, 148.5, 141.8, 137.5, 135.2, 124.4, 123.7, 58.00, 56.08, 46.15, 41.34, 32.32, 27.14, 25.03, 23.41, 14.21; MS (ESI)  $m/z$  332.1 ( $\text{MH}^+$ ); HRMS(ESI) calcd. for  $\text{C}_{17}\text{H}_{25}\text{N}_5\text{O}_2$  331.2008, found 332.2079 ( $\text{MH}^+$ ), HPLC  $t_R = 10.98$  min, purity 99.5%.

## ICP-AES analysis

Cu content was determined by ICP-AES analysis. Test solutions were prepared by dissolving **Alk1**, **Az31** or KDM5C in 10% DMSO aqueous solution. Solutions for the standard curve were prepared by diluting copper standard solution (1000 mg/L, Merck) with 10% DMSO aqueous solution. Analytical conditions for ICP-AES: instrument ICPS-8100 Shimadzu, RF power 1.2 kW, plasma gas flow 1.2 L/min (Ar), auxiliary gas flow 14.0 mL/min (Ar), carrier gas flow 0.7 L/min (Ar), wavelength 324.754 nm (Cu).

## Free metal ion-catalyzed azide-alkyne cycloaddition by HPLC analysis

A solution of **Alk4** (20 mM) and **Az1** (40 mM) in DMSO (200  $\mu$ L) was reacted in the presence/absence of  $(\text{NH}_4)_2\text{Fe}(\text{SO}_4)_2 \cdot 6\text{H}_2\text{O}$  (40, 20, 15, 10, or 2 mM) or  $\text{MnCl}_2$  (20 mM) in  $\text{H}_2\text{O}$  (100  $\mu$ L) at 100°C for 5 h. The reaction mixture was diluted with  $\text{CH}_3\text{CN}/\text{H}_2\text{O}$  (200  $\mu$ L) and filtered through a 0.45  $\mu$ m filter. Then, the resulting mixture was analyzed by HPLC. HPLC was performed with Shimadzu instrument equipped with a COSMOSIL packed column (5C18-AR-II, 4.6 ID  $\times$  150 mm, nacalai) for analysis; the eluents were used water contained 0.1% TFA (A) and MeCN contained 0.1% TFA (B). The conditions for analytical HPLC were as follows; flow rate 1.0 mL/min, measuring wavelength 254 nm, gradient A/B 0 to 20 min (90/10 to 10/90), 20 to 30 min (10/90), 30 to 40 min (10/90 to 90/10) for Fe(II)-catalyzed reaction or gradient A/B 0 to 5 min (90/10), 5 to 20 min (90/10 to 10/90), 20 to 30 min (10/90), 30 to 40 min (10/90 to 90/10) for Mn(II)-catalyzed reaction.

## UV-vis spectral analysis

UV-Vis spectra were recorded on a JASCO V-770 spectrophotometer at room temperature. Test samples were prepared by dissolving **T31** (final concentration: 100  $\mu$ M) and  $(\text{NH}_4)_2\text{Fe}(\text{SO}_4)_2$  (final concentration: 0, 25, 50, or 100  $\mu$ M) with 800  $\mu$ L of  $\text{AcCN}/\text{H}_2\text{O}$  (1:1). Absorbances of the samples were normalized by corresponding blank solutions containing  $(\text{NH}_4)_2\text{Fe}(\text{SO}_4)_2$ .



# NMR spectrum of *anti*-T31, *syn*-T31, and *anti*-T31'

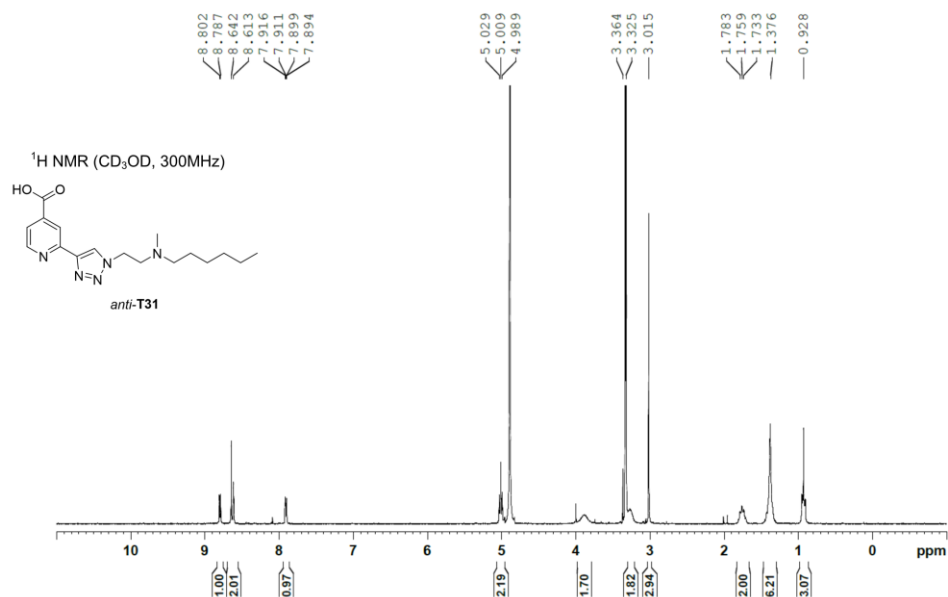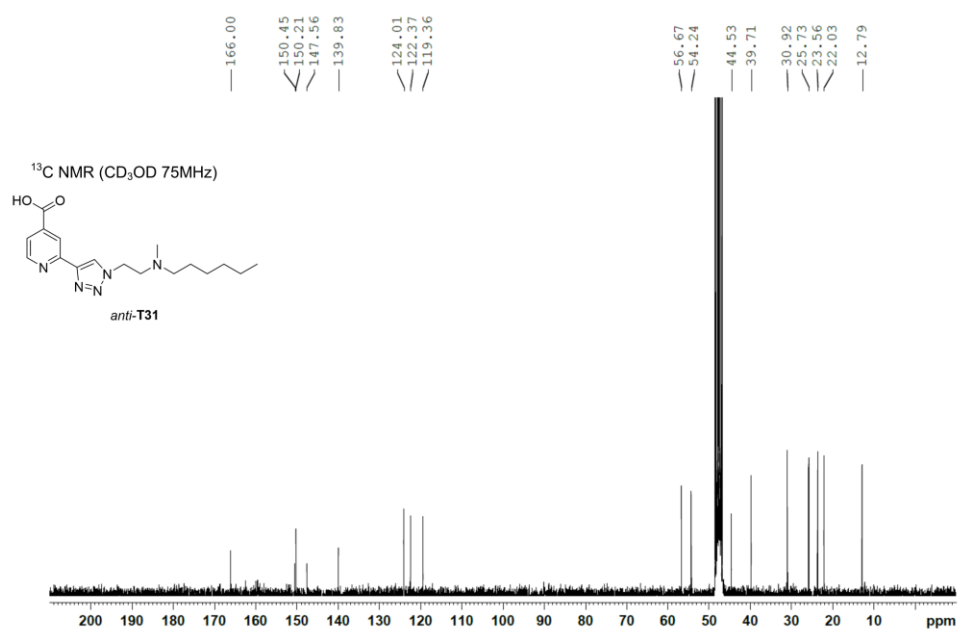

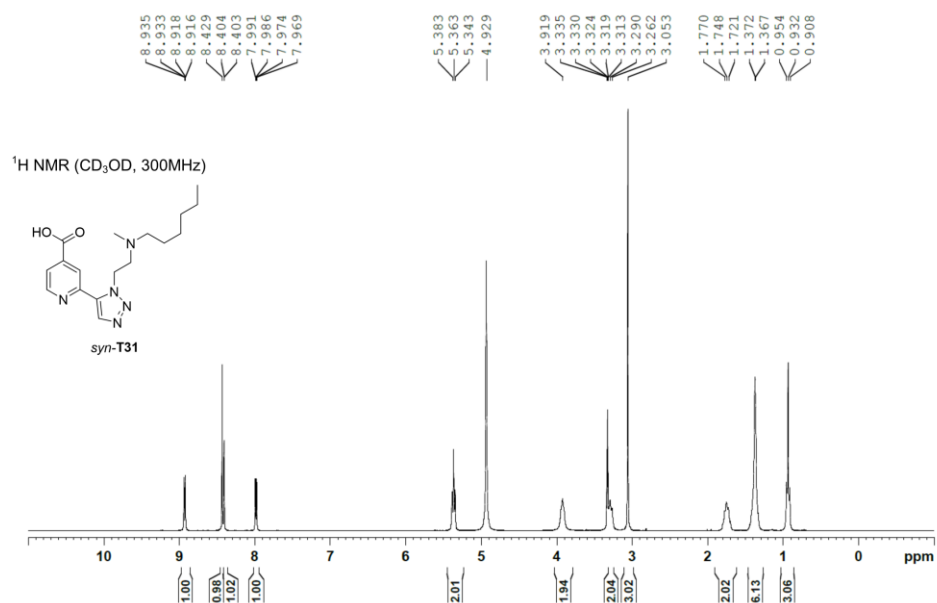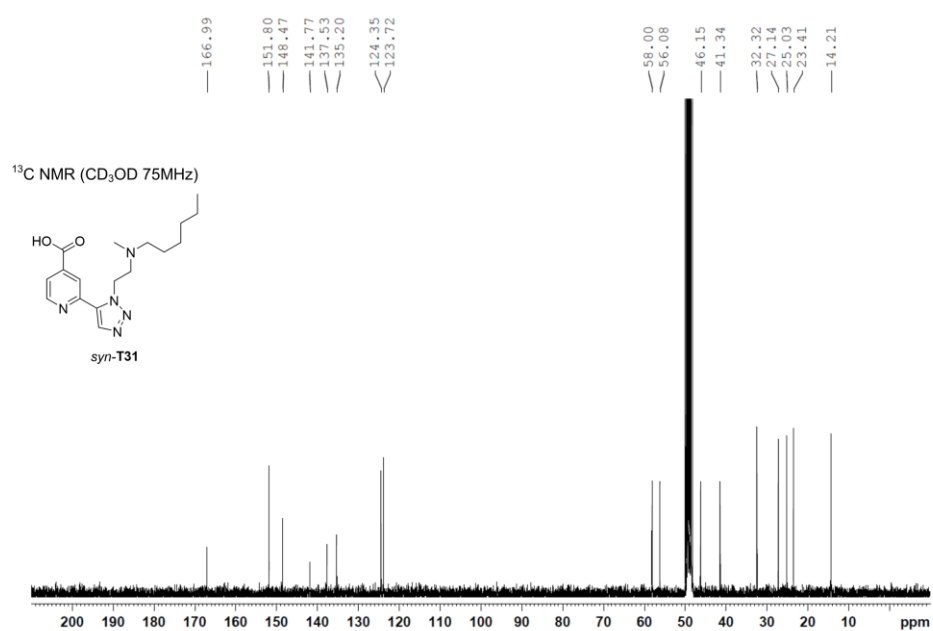

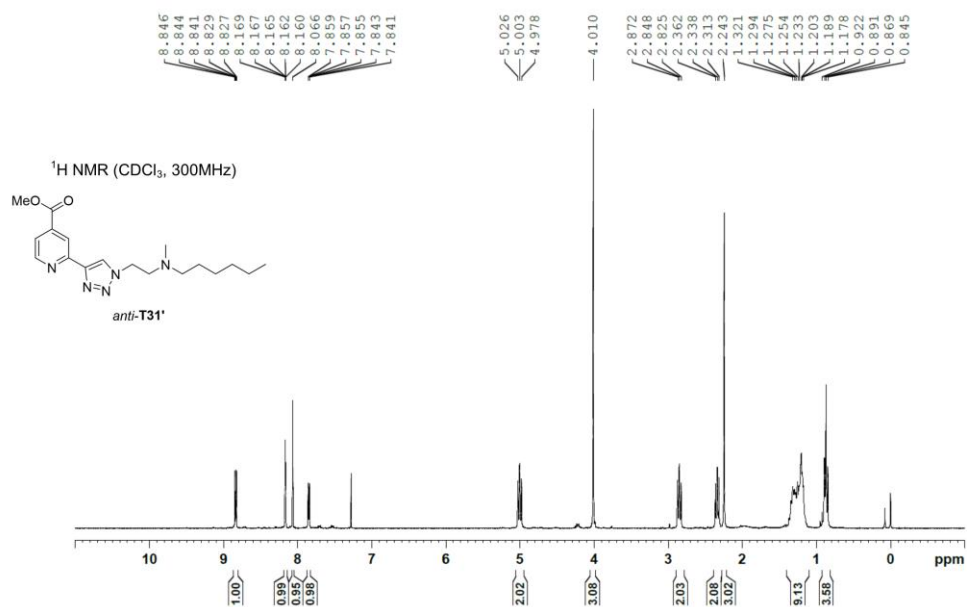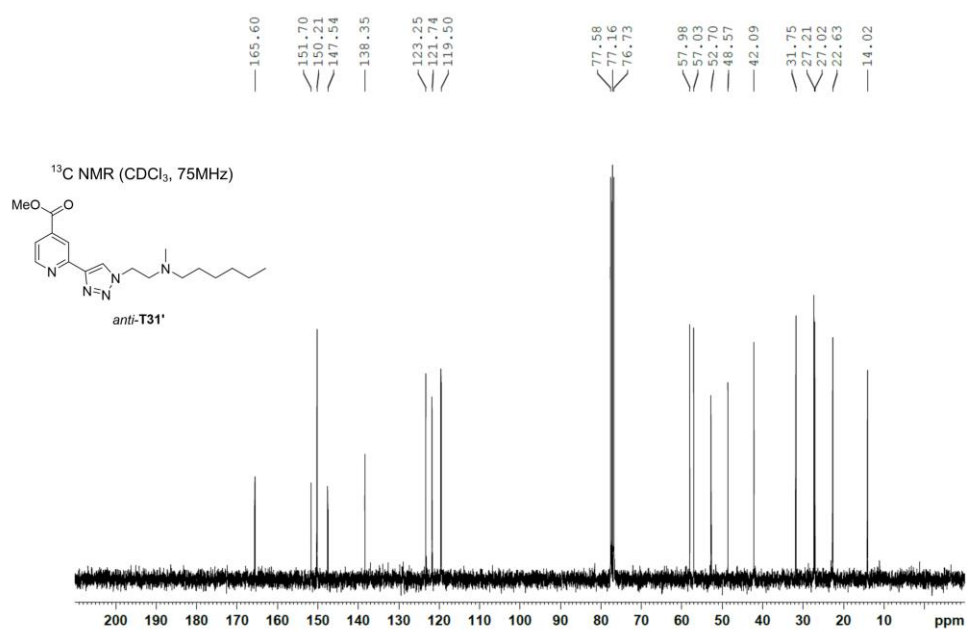

Supplement: Supplementary file 1 [file 22395243]
